# Supplementary material
Source: MDPI journal article supplement (https://www.mdpi.com/2073-4441/13/23/3443)
Supplement: s1 [file s1]

# Epiphyton in agricultural streams: structural control and comparison to epilithon

Lishani Wijewardene<sup>1,2,3\*</sup>, Naicheng Wu<sup>1,4\*</sup>, Pau Giménez-Grau<sup>2</sup>, Cecilie Holmboe<sup>2</sup>, Nicola Fohrer<sup>1</sup>, Annette Baattrup-Pedersen<sup>5</sup> and Tenna Riis<sup>2,6</sup>

<sup>1</sup> Department of Hydrology and Water Resources Management, Institute for Natural Resource Conservation, Kiel University, 24118 Kiel, Germany

<sup>2</sup> Department of Biology, Aarhus University, Ole Worms Allé 1, 8000 Aarhus C, Denmark

<sup>3</sup> Department of Limnology and Water Technology, Faculty of Fisheries and Marine Sciences & Technology, University of Ruhuna, 81000 Matara, Sri Lanka

<sup>4</sup> Department of Geography and Spatial Information Techniques, Ningbo University, Ningbo 315211, China

<sup>5</sup> Department of Bioscience, Aarhus University, Vejlshøjvej 25, 8800 Silkeborg, Denmark

<sup>6</sup> WATEC, Aarhus University Centre for Water Technology, Department of Biology, 8000 Aarhus C, Denmark

\* Correspondence: lishani@hydrology.uni-kiel.de (L.W.); nwu@hydrology.uni-kiel.de (N.W.)

**Table S1.** Description of nine environmental variables used in our study.

| Environmental variable code                       | Unit                                      | Description                                                                                                                                                                                                                                                   |
|---------------------------------------------------|-------------------------------------------|---------------------------------------------------------------------------------------------------------------------------------------------------------------------------------------------------------------------------------------------------------------|
| <b>Other environmental variables (Other env.)</b> |                                           |                                                                                                                                                                                                                                                               |
| Light                                             | Photons m <sup>-2</sup> day <sup>-1</sup> | Cumulative light in 21 days                                                                                                                                                                                                                                   |
| Temperature                                       | °C                                        | Mean temperature in 21 days                                                                                                                                                                                                                                   |
| DOC                                               | mg L <sup>-1</sup>                        | Mean of daily average dissolved organic carbon (DOC) concentrations in 21 days period before sampling date                                                                                                                                                    |
| <b>Hydrology</b>                                  |                                           |                                                                                                                                                                                                                                                               |
| Q <sub>med</sub>                                  | L s <sup>-1</sup>                         | Median of the discharge in 21 days period before sampling date                                                                                                                                                                                                |
| CV of Q                                           | %                                         | Coefficient of variation of discharge in 21 days period before sampling date                                                                                                                                                                                  |
| Fre <sub>Low</sub>                                | days                                      | Frequency of low discharge: number of days during 21 days period, where the magnitude of discharge remains below a lower threshold. Low discharge is defined as daily mean flow below the 25th percentile of all daily values for the time period 2019 - 2020 |
| Fre <sub>High</sub>                               | days                                      | Frequency of high discharge: number of days during 21 days period, where the magnitude of discharge remains above a higher threshold. High discharge is defined as flow above the 75th percentile of all daily values for the time period 2019 - 2020         |
| <b>Nutrients</b>                                  |                                           |                                                                                                                                                                                                                                                               |
| PO <sub>4</sub> <sup>3-</sup>                     | mg L <sup>-1</sup>                        | Mean of daily average phosphate (PO <sub>4</sub> <sup>3-</sup> ) concentrations in 21 days period before sampling date                                                                                                                                        |
| DIN                                               | mg L <sup>-1</sup>                        | Mean of daily average dissolved inorganic nitrogen (DIN) concentrations in 21 days period before sampling date                                                                                                                                                |

**Table S2.** Epiphyton and epilithon biomass and AI related to environmental variables (Kendall correlation coefficients; displayed only significant co-relations  $p < 0.05$ ). Correlations are significant but weak ( $< 0.40$ ).

| Variables                     | Epiphyton |       |       | Epilithon |       |       |
|-------------------------------|-----------|-------|-------|-----------|-------|-------|
|                               | Chl-a     | AFDM  | AI    | Chl-a     | AFDM  | AI    |
| Light                         | 0.27      | 0.22  | -0.19 |           | 0.16  | 0.18  |
| Temperature                   |           | 0.36  |       |           | 0.19  |       |
| DOC                           | -0.20     | -0.16 |       |           | -0.07 |       |
| Q <sub>med</sub>              | -0.22     | -0.24 | 0.13  |           | -0.10 |       |
| CV of Q                       | -0.23     | -0.09 | 0.25  | -0.20     |       | 0.2   |
| PO <sub>4</sub> <sup>3-</sup> | 0.07      | 0.25  |       | 0.30      |       | -0.19 |
| DIN                           |           | -0.35 | 0.02  |           | -0.14 |       |

**Table S3.** Relative abundance (%) of 20 most abundant diatom species in the biofilms.

| Diatom species name                                                           | Epiphyton |            | Epilithon |            |
|-------------------------------------------------------------------------------|-----------|------------|-----------|------------|
|                                                                               | Aarhus    | Lyngbygård | Aarhus    | Lyngbygård |
| <i>Achnantheidium minutissimum</i> (Kützing) Czarnecki 1994                   | 12.01     | 3.43       | 46.91     | 27.58      |
| <i>Amphora pediculus</i> (Kützing) Grunow 1875                                | 2.08      | 1.03       | 1.67      | 3.50       |
| <i>Aulacoseira ambigua</i> (Grunow) Simonsen 1979                             |           | 3.15       |           | 1.38       |
| <i>Cocconeis pediculus</i> Ehrenberg 1838                                     | 1.77      | 4.05       | 1.52      |            |
| <i>Cocconeis placentula</i> Ehrenberg 1838                                    | 0.97      |            |           |            |
| <i>Cocconeis placentula</i> var. <i>euglypta</i> (Ehrenberg) Grunow 1884      | 26.98     | 24.44      | 7.32      | 7.97       |
| <i>Cyclostephanos dubius</i> (Fricke) Round 1987                              | 1.53      | 3.98       | 0.43      | 3.70       |
| <i>Diatoma vulgare</i> Bory 1824                                              |           | 1.30       |           |            |
| <i>Encyonema silesiacum</i> (Bleisch) Mann 1990                               | 1.27      |            |           |            |
| <i>Fragilaria capucina</i> var. <i>Gracilis</i> (Østrup) Hustedt 1950         |           | 1.02       |           | 0.96       |
| <i>Fragilaria vaucheriae</i> (Kützing) Petersen 1938                          | 4.68      |            | 3.25      | 1.47       |
| <i>Gomphonema olivaceum</i> (Hornemann) Ehrenberg 1838                        | 1.97      | 6.83       | 2.93      | 1.79       |
| <i>Gomphonema parvulum</i> (Kützing) Kützing 1849                             | 2.45      | 7.15       | 1.42      | 2.75       |
| <i>Gomphonema pumilum</i> (Grunow) Reichardt & Lange-Bertalot 1991            |           | 1.60       |           |            |
| <i>Gomphonema pumilum</i> var. <i>rigidum</i> Reichardt & Lange-Bertalot 1997 |           | 1.69       |           |            |
| <i>Gomphonema</i> sp. Ehrenberg, 1832                                         | 0.78      | 3.24       |           | 1.05       |
| <i>Melosira varians</i> Agardh 1827                                           | 3.83      |            | 0.57      |            |
| <i>Navicula capitatoradiata</i> Germain 1981                                  | 0.73      |            |           |            |
| <i>Navicula cryptotenella</i> Lange-Bertalot 1985                             | 3.71      | 2.15       | 2.33      | 0.92       |
| <i>Navicula gregaria</i> Donkin 1861                                          | 2.72      | 1.45       | 3.25      | 2.59       |
| <i>Navicula lanceolata</i> Ehrenberg 1838                                     | 7.49      | 9.87       | 8.51      | 10.91      |
| <i>Navicula minima</i> Grunow 1880                                            |           |            |           | 1.51       |
| <i>Navicula reichardtiana</i> Lange-Bertalot 1989                             | 4.27      |            | 1.58      |            |
| <i>Navicula tripunctata</i> (Müller) Bory 1822                                | 3.65      | 7.19       | 1.43      | 3.11       |
| <i>Nitzschia frustulum</i> (Kützing) Grunow 1880                              |           |            | 0.43      |            |
| <i>Nitzschia palea</i> (Kützing) Smith 1856                                   | 1.54      | 1.30       | 1.22      | 1.11       |
| <i>Planothidium frequentissimum</i> (Lange-Bertalot) Lange-Bertalot 1999      |           |            | 1.11      | 5.36       |
| <i>Planothidium lanceolatum</i> (Brébisson ex Kützing) Lange-Bertalot 1999    | 1.39      | 1.01       | 3.46      | 4.07       |
| <i>Rhoicosphenia abbreviata</i> (Agardh) Lange-Bertalot 1980                  |           | 1.77       |           |            |
| <i>Staurosira construens</i> f. <i>venter</i> (Ehrenberg) Bukhtiyarova 1995   |           |            | 0.68      | 1.33       |
| <i>Staurosira construens</i> var. <i>construens</i> Ehrenberg 1843            |           |            |           | 0.98       |
| <i>Staurosirella pinnata</i> (Ehrenberg) Williams & Round 1988                |           |            | 0.53      |            |

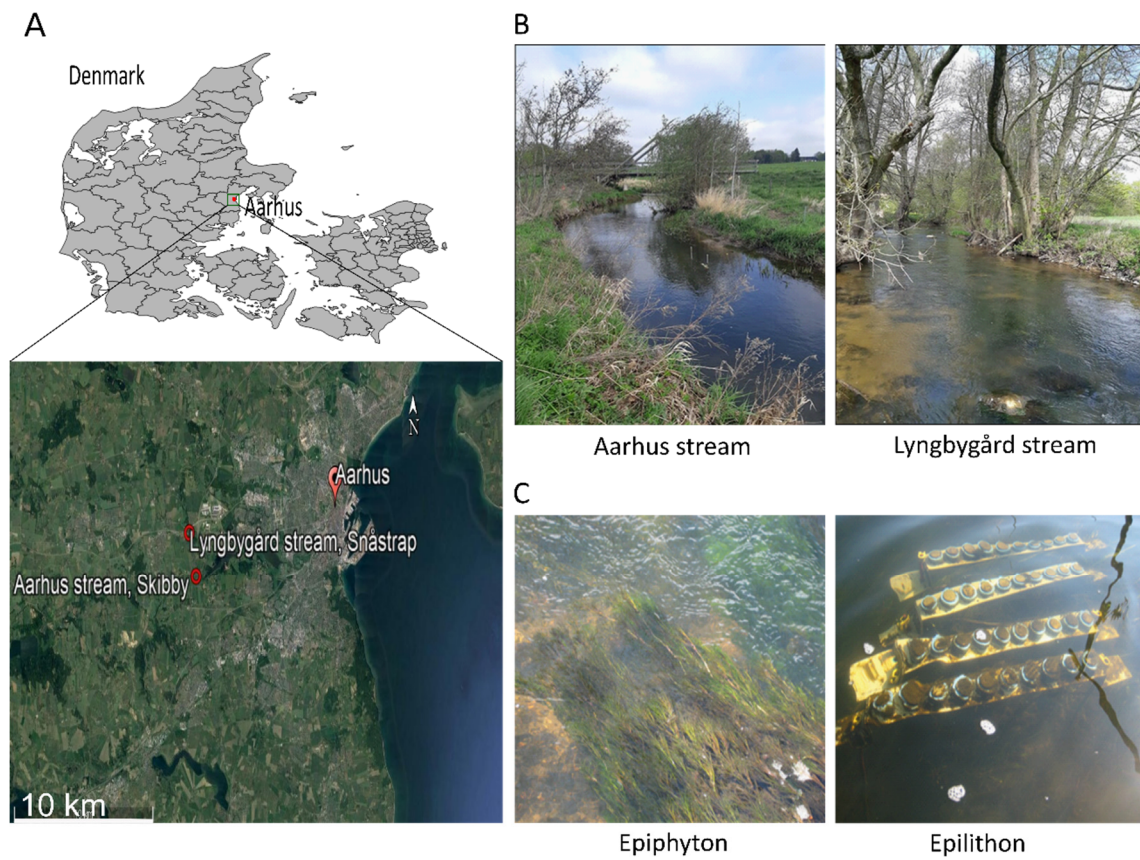

**Figure S1.** Location of monitored two agricultural streams at Aarhus, Denmark (A), study sites (B: Aarhus stream and Lyngbygård stream) and studied stream algae communities (C: epiphyton and epilithon).

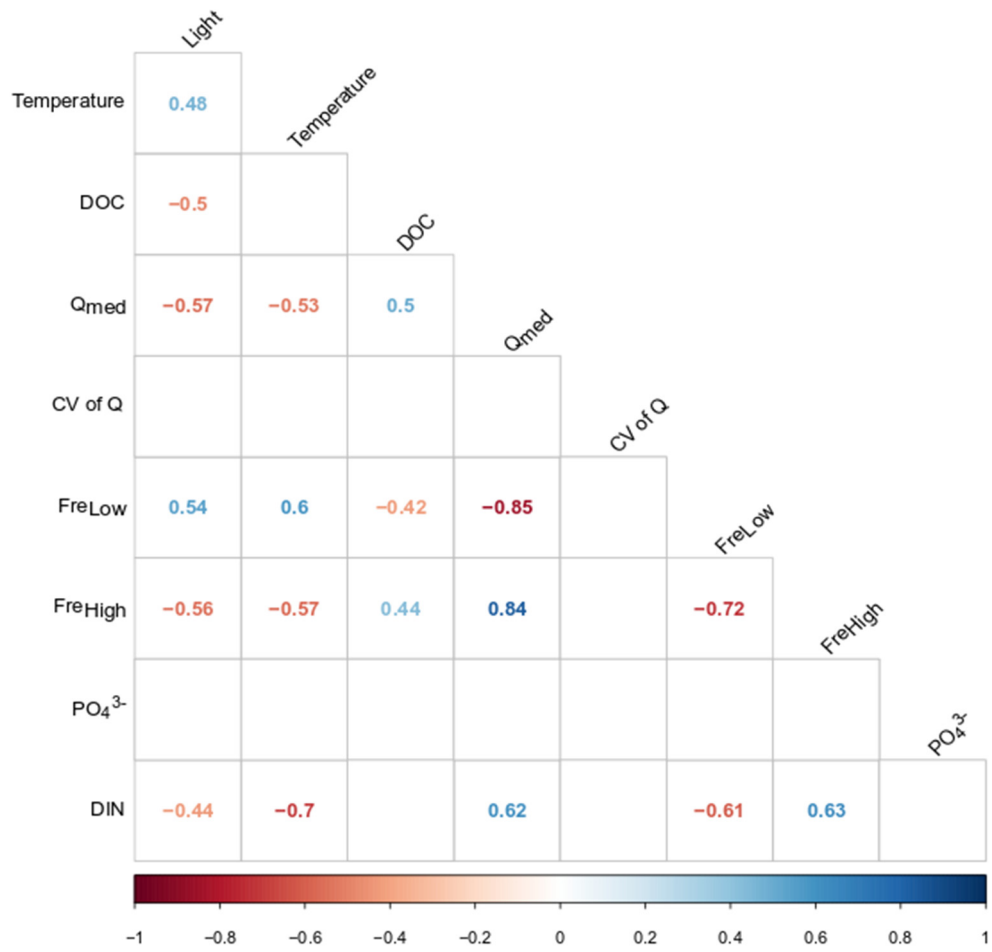

**Figure S2.** Correlations between environmental variables.

Only significant correlations ( $p < 0.05$ , Kendall correlation coefficients) are shown in here.
